# Supplementary material for: Determination of Cultivation Regions and Quality Parameters of Poria cocos by Near-Infrared Spectroscopy and Chemometrics
Source: MDPI journal article supplement (doi:10.3390/foods11060892), 2022-03-21
Supplement: s1 [file s1]

# Determination of Cultivation Regions and Quality Parameters of *Poria cocos* by Near-Infrared Spectroscopy and Chemometrics

Jing Xie <sup>1</sup>, Jian-hua Huang <sup>1</sup>, Guang-xi Ren <sup>2</sup>, Jin Jian <sup>1</sup>, Lin Chen <sup>1</sup>, Can Zhong <sup>1</sup>, Yuan Cai <sup>1</sup>, Hao Liu <sup>1</sup>, Rong-rong Zhou <sup>1</sup>, Yu-hui Qin <sup>1</sup> and Shui-han Zhang <sup>1,\*</sup>

<sup>1</sup> Hunan Academy of Chinese Medicine, Hunan University of Chinese Medicine, Changsha 410013, China; axxj2057@163.com (J.X.); jhhuang85@163.com (J.-h.H.); jinjian2016@163.com (J.J.); chenlin5202@126.com (L.C.); canzhong651@163.com (C.Z.); tcmyuanyuan@163.com (Y.C.); zrziqing@126.com (H.L.); rz172@georgetown.edu (R.-r.Z.); hntcmaqyh@126.com (Y.-h.Q.)

<sup>2</sup> College of Chinese Pharmacy, Beijing University of Chinese Medicine, Beijing 102488, China; renguangxiabc@163.com

\* Correspondence: zhangshuihan@hnuucm.edu.cn; Tel.: +86-0731-88881651

**Table S1.** *Poria cocos* samples information.

| N0. <sup>a</sup> | Cultivation region <sup>b</sup> | Dataset     | N0.  | Cultivation region | Dataset     |
|------------------|---------------------------------|-------------|------|--------------------|-------------|
| S.1              | YN                              | Calibration | S.70 | YN                 | Calibration |
| S.2              | YN                              | Calibration | S.71 | YN                 | Calibration |
| S.3              | XQ                              | Calibration | S.72 | DBM                | Calibration |
| S.4              | DBM                             | Calibration | S.73 | DBM                | Validation  |
| S.5              | DBM                             | Calibration | S.74 | DBM                | Calibration |
| S.6              | YN                              | Calibration | S.75 | DBM                | Calibration |
| S.7              | YN                              | Calibration | S.76 | DBM                | Validation  |
| S.8              | YN                              | Calibration | S.77 | DBM                | Calibration |
| S.9              | YN                              | Calibration | S.78 | XQ                 | Ignore      |
| S.10             | YN                              | Calibration | S.79 | YN                 | Validation  |
| S.11             | YN                              | Calibration | S.80 | DBM                | Validation  |
| S.12             | YN                              | Calibration | S.81 | XQ                 | Calibration |
| S.13             | YN                              | Ignore      | S.82 | YN                 | Calibration |
| S.14             | YN                              | Calibration | S.83 | XQ                 | Calibration |
| S.15             | YN                              | Calibration | S.84 | DBM                | Calibration |
| S.16             | YN                              | Validation  | S.85 | XQ                 | Calibration |
| S.17             | YN                              | Calibration | S.86 | XQ                 | Calibration |
| S.18             | YN                              | Calibration | S.87 | XQ                 | Calibration |
| S.19             | YN                              | Validation  | S.88 | XQ                 | Calibration |
| S.20             | DBM                             | Calibration | S.89 | XQ                 | Calibration |
| S.21             | YN                              | Calibration | S.90 | XQ                 | Calibration |
| S.22             | YN                              | Validation  | S.91 | XQ                 | Calibration |
| S.23             | YN                              | Calibration | S.92 | XQ                 | Validation  |
| S.24             | YN                              | Calibration | S.93 | DBM                | Validation  |

---

|      |     |             |       |     |             |
|------|-----|-------------|-------|-----|-------------|
| S.25 | YN  | Validation  | S.94  | YN  | Calibration |
| S.26 | YN  | Calibration | S.95  | DBM | Calibration |
| S.27 | YN  | Calibration | S.96  | DBM | Calibration |
| S.28 | XQ  | Calibration | S.97  | DBM | Calibration |
| S.29 | YN  | Calibration | S.98  | XQ  | Calibration |
| S.30 | YN  | Calibration | S.99  | XQ  | Calibration |
| S.31 | XQ  | Calibration | S.100 | DBM | Validation  |
| S.32 | YN  | Calibration | S.101 | DBM | Validation  |
| S.33 | YN  | Calibration | S.102 | DBM | Validation  |
| S.34 | YN  | Calibration | S.103 | YN  | Calibration |
| S.35 | YN  | Validation  | S.104 | XQ  | Calibration |
| S.36 | YN  | Calibration | S.105 | DBM | Calibration |
| S.37 | DBM | Calibration | S.106 | DBM | Calibration |
| S.38 | XQ  | Calibration | S.107 | XQ  | Calibration |
| S.39 | YN  | Calibration | S.108 | XQ  | Calibration |
| S.40 | XQ  | Calibration | S.109 | DBM | Validation  |
| S.41 | XQ  | Calibration | S.110 | DBM | Calibration |
| S.42 | YN  | Calibration | S.111 | DBM | Calibration |
| S.43 | YN  | Calibration | S.112 | DBM | Validation  |
| S.44 | YN  | Calibration | S.113 | YN  | Calibration |
| S.45 | YN  | Calibration | S.114 | DBM | Calibration |
| S.46 | YN  | Calibration | S.115 | YN  | Calibration |
| S.47 | XQ  | Calibration | S.116 | DBM | Calibration |
| S.48 | YN  | Calibration | S.117 | XQ  | Calibration |
| S.49 | YN  | Calibration | S.118 | DBM | Calibration |
| S.50 | YN  | Validation  | S.119 | YN  | Calibration |
| S.51 | DBM | Calibration | S.120 | XQ  | Calibration |
| S.52 | DBM | Calibration | S.121 | YN  | Validation  |
| S.53 | DBM | Calibration | S.122 | DBM | Calibration |
| S.54 | DBM | Calibration | S.123 | YN  | Calibration |
| S.55 | YN  | Calibration | S.124 | XQ  | Calibration |
| S.56 | DBM | Calibration | S.125 | YN  | Calibration |
| S.57 | DBM | Validation  | S.126 | DBM | Calibration |
| S.58 | DBM | Calibration | S.127 | YN  | Calibration |
| S.59 | YN  | Calibration | S.128 | DBM | Validation  |
| S.60 | DBM | Calibration | S.129 | YN  | Calibration |
| S.61 | DBM | Calibration | S.130 | YN  | Calibration |
| S.62 | DBM | Calibration | S.131 | DBM | Calibration |
| S.63 | DBM | Calibration | S.132 | DBM | Calibration |
| S.64 | DBM | Validation  | S.133 | YN  | Validation  |
| S.65 | DBM | Validation  | S.134 | YN  | Calibration |
| S.66 | DBM | Calibration | S.135 | DBM | Calibration |

---

---

|      |     |            |       |     |             |
|------|-----|------------|-------|-----|-------------|
| S.67 | DBM | Validation | S.136 | XQ  | Validation  |
| S.68 | DBM | Validation | S.137 | DBM | Ignore      |
| S.69 | DBM | Validation | S.138 | XQ  | Calibration |

---

<sup>a</sup>, Sample number; <sup>b</sup>, Sample from Cultivation region; YN, Yunnan region; XQ, Xiangqian region; DBM, Dabie Mountains region.
